# Supplementary material
Source: PubMed Central journal article supplement (PMC1188108)

## Kaplan-Meier curves for black v. white by age group

### < 65 years

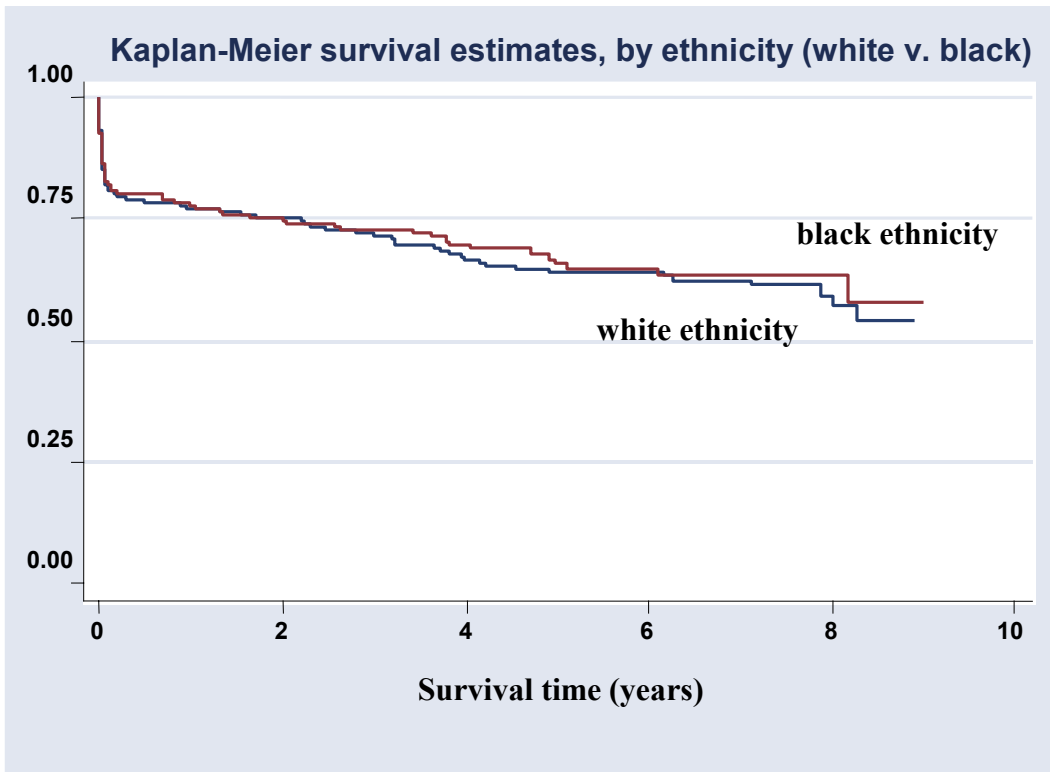

### 65-74 years

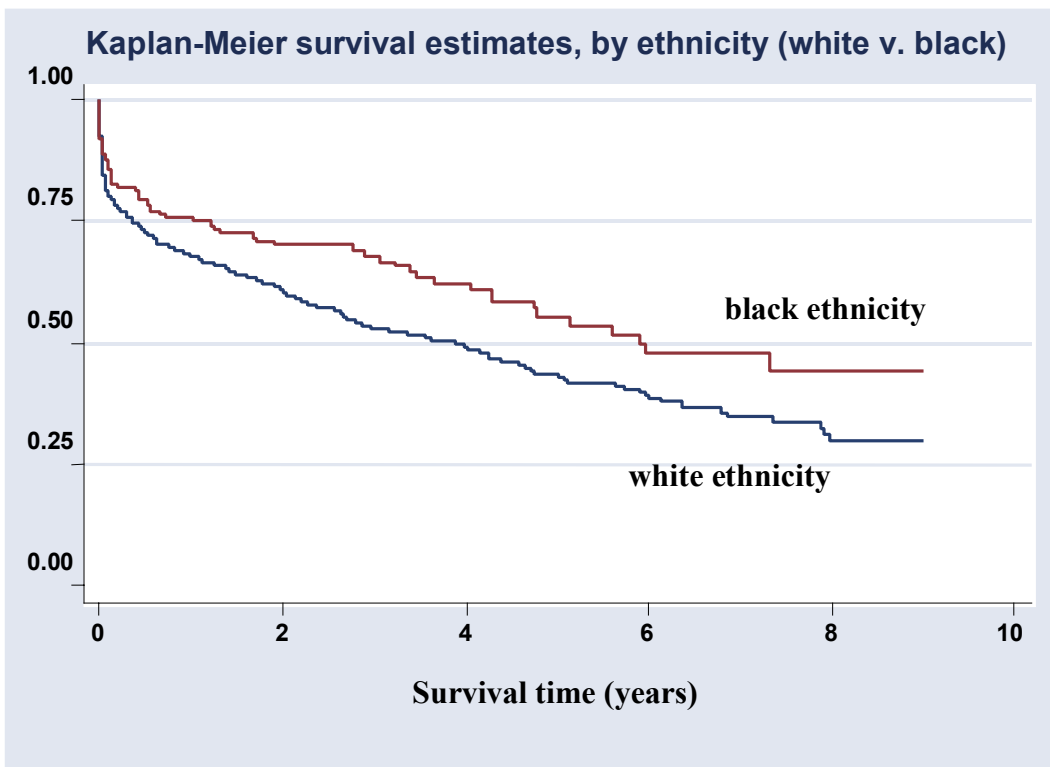

75-84 years

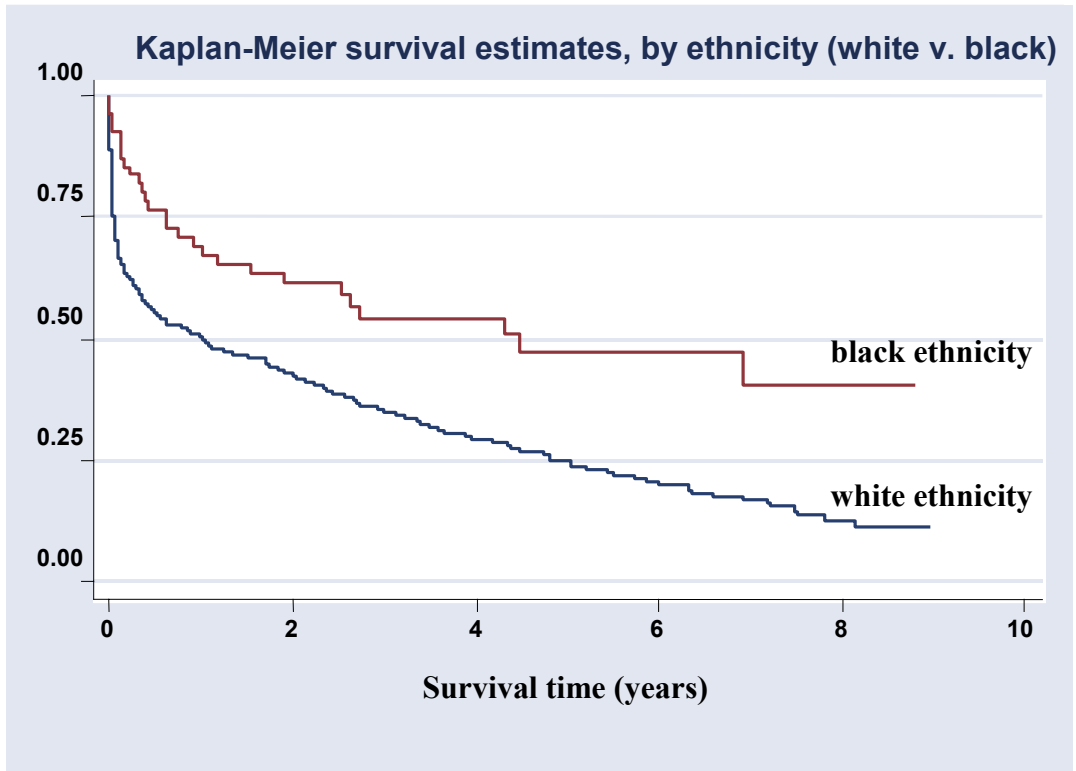

85 years +

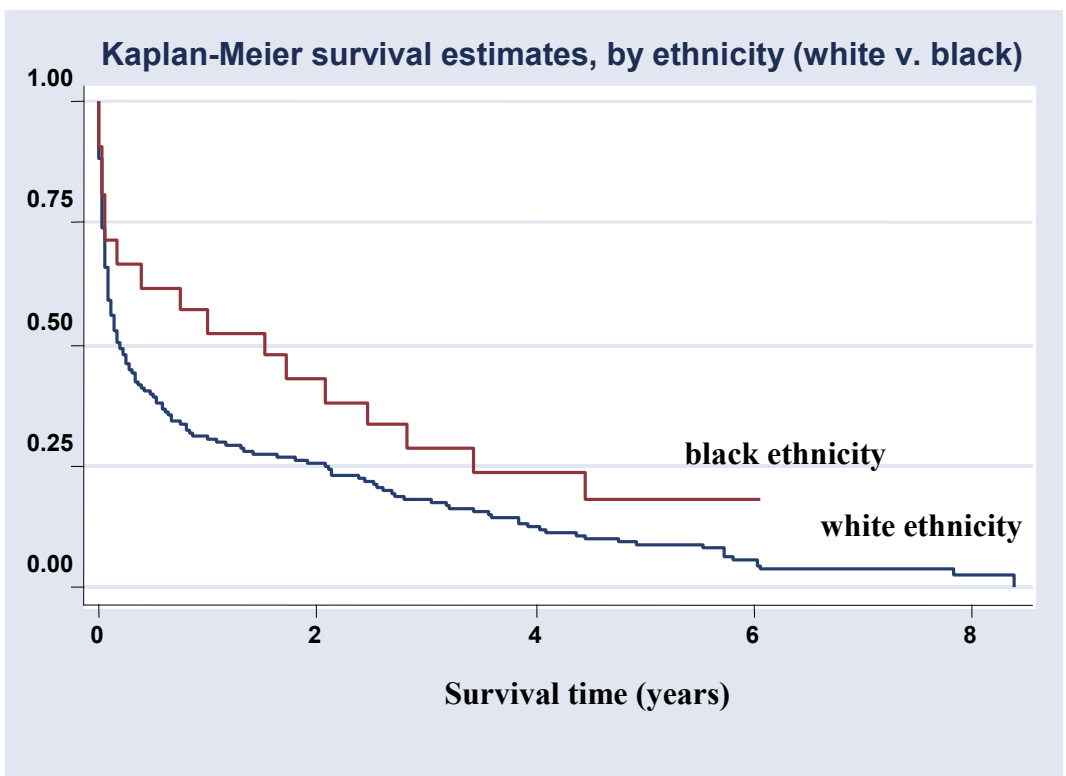

Kaplan-Meier curves for black v. white by prior Barthel score

15-20

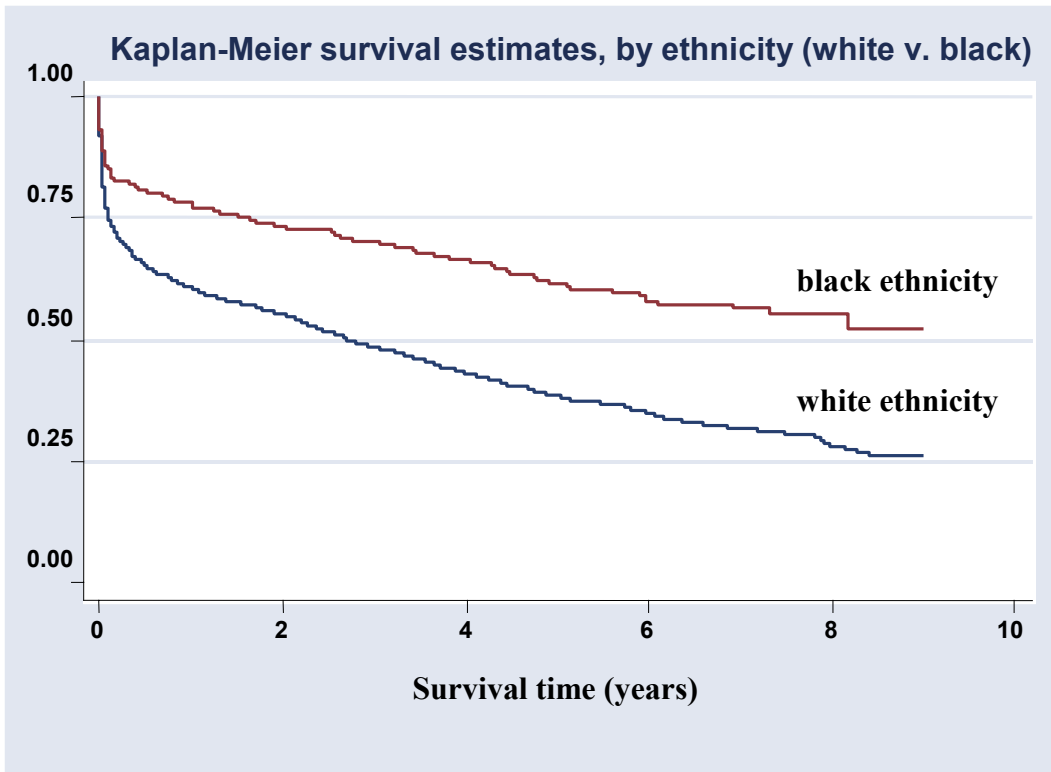

0-14

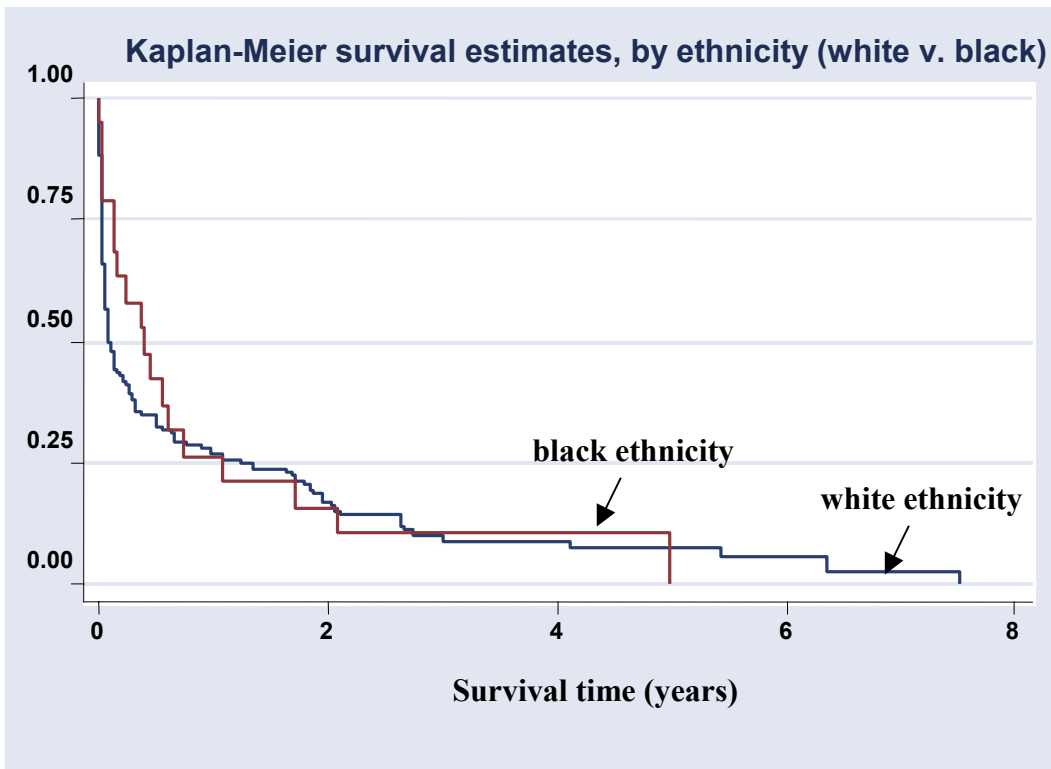

Supplement: bmj_38510.458218.8F_1.pdf [file bmj_38510.458218.8F_1.pdf]
